# Supplementary material for: Temporal Variations in Land Surface Temperature within an Urban Ecosystem: A Comprehensive Assessment of Land Use and Land Cover Change in Kharkiv, Ukraine
Source: MDPI journal article supplement (doi:10.3390/rs16091637), 2024-05-03

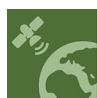

Table S1. Landsat dataset

| Date       | Scene ID                                    | Resolution, m | Cloud, % | Daytime air, °C |
|------------|---------------------------------------------|---------------|----------|-----------------|
| 16/04/2023 | LANDSAT/LC08/C02/T1_L2/LC08_177025_20230416 | 30            | 8.65     | 14              |
| 17/05/2023 | LANDSAT/LC09/C02/T1_L2/LC09_178025_20230517 | 30            | 8.13     | 25              |
| 02/06/2023 | LANDSAT/LC09/C02/T1_L2/LC09_178025_20230602 | 30            | 0.1      | 25              |
| 20/07/2023 | LANDSAT/LC09/C02/T1_L2/LC09_178025_20230720 | 30            | 2.54     | 27.8            |
| 06/08/2023 | LANDSAT/LC08/C02/T1_L2/LC08_177025_20230806 | 30            | 0        | 35.4            |
| 14/09/2023 | LANDSAT/LC08/C02/T1_L2/LC08_178025_20230914 | 30            | 8.23     | 23.3            |
| 07/04/2020 | LANDSAT/LC08/C02/T1_L2/LC08_177025_20200407 | 30            | 0.02     | 13.6            |
| 23/04/2020 | LANDSAT/LC08/C02/T1_L2/LC08_177025_20200423 | 30            | 0.08     | 16              |
| 07/05/2022 | LANDSAT/LC09/C02/T1_L2/LC09_177025_20220507 | 30            | 5.48     | 25              |
| 10/06/2020 | LANDSAT/LC08/C02/T1_L2/LC08_177025_20200610 | 30            | 0.12     | 31.9            |
| 26/06/2020 | LANDSAT/LC08/C02/T1_L2/LC08_177025_20200626 | 30            | 1.2      | 29.4            |
| 12/07/2020 | LANDSAT/LC08/C02/T1_L2/LC08_177025_20200712 | 30            | 0        | 30.8            |
| 03/07/2020 | LANDSAT/LC08/C02/T1_L2/LC08_178025_20200703 | 30            | 0.46     | 32.4            |
| 04/08/2020 | LANDSAT/LC08/C02/T1_L2/LC08_178025_20200804 | 30            | 0.8      | 27.7            |
| 14/09/2020 | LANDSAT/LC08/C02/T1_L2/LC08_177025_20200914 | 30            | 0.12     | 23.5            |
| 21/09/2020 | LANDSAT/LC08/C02/T1_L2/LC08_178025_20200921 | 30            | 0.01     | 19.9            |
| 09/04/2018 | LANDSAT/LC08/C02/T1_L2/LC08_178025_20180409 | 30            | 1.65     | 11.8            |
| 04/05/2018 | LANDSAT/LC08/C02/T1_L2/LC08_177025_20180504 | 30            | 0.01     | 30.5            |
| 11/05/2018 | LANDSAT/LC08/C02/T1_L2/LC08_178025_20180511 | 30            | 0.03     | 18.1            |
| 27/05/2018 | LANDSAT/LC08/C02/T1_L2/LC08_178025_20180527 | 30            | 0.02     | 22.2            |
| 21/06/2018 | LANDSAT/LC08/C02/T1_L2/LC08_177025_20180621 | 30            | 0.01     | 29.7            |
| 30/07/2018 | LANDSAT/LC08/C02/T1_L2/LC08_178025_20180730 | 30            | 2.97     | 33.5            |
| 24/08/2018 | LANDSAT/LC08/C02/T1_L2/LC08_177025_20180824 | 30            | 0.01     | 27.3            |
| 22/09/2017 | LANDSAT/LC08/C02/T1_L2/LC08_177025_20170922 | 30            | 0.01     | 27.6            |
| 10/04/2015 | LANDSAT/LC08/C02/T1_L2/LC08_177025_20150410 | 30            | 0.11     | 22              |
| 16/05/2014 | LANDSAT/LC08/C02/T1_L2/LC08_178025_20140516 | 30            | 9.53     | 29.6            |
| 04/06/2015 | LANDSAT/LC08/C02/T1_L2/LC08_178025_20150604 | 30            | 0.18     | 29              |
| 13/06/2015 | LANDSAT/LC08/C02/T1_L2/LC08_177025_20150613 | 30            | 0.06     | 28.3            |
| 12/07/2014 | LANDSAT/LC08/C02/T1_L2/LC08_177025_20140712 | 30            | 5.63     | 31.2            |
| 04/08/2014 | LANDSAT/LC08/C02/T1_L2/LC08_178025_20140804 | 30            | 6.43     | 30.9            |
| 13/08/2014 | LANDSAT/LC08/C02/T1_L2/LC08_177025_20140813 | 30            | 0.54     | 33              |
| 20/08/2014 | LANDSAT/LC08/C02/T1_L2/LC08_178025_20140820 | 30            | 1.6      | 29              |
| 17/09/2015 | LANDSAT/LC08/C02/T1_L2/LC08_177025_20150917 | 30            | 0.02     | 26              |
| 24/09/2015 | LANDSAT/LC08/C02/T1_L2/LC08_178025_20150924 | 30            | 0.03     | 30              |
| 22/04/2011 | LANDSAT/LT05/C02/T1_L2/LT05_178025_20110422 | 30            | 0        | 16.1            |
| 02/06/2011 | LANDSAT/LT05/C02/T1_L2/LT05_177025_20110602 | 30            | 0        | 27.9            |
| 18/06/2011 | LANDSAT/LT05/C02/T1_L2/LT05_177025_20110618 | 30            | 4        | 29.2            |
| 20/07/2011 | LANDSAT/LT05/C02/T1_L2/LT05_177025_20110720 | 30            | 4        | 32.8            |

|            |                                             |    |    |      |
|------------|---------------------------------------------|----|----|------|
| 27/07/2011 | LANDSAT/LT05/C02/T1_L2/LT05_177025_20110720 | 30 | 0  | 35.7 |
| 28/08/2011 | LANDSAT/LT05/C02/T1_L2/LT05_178025_20110828 | 30 | 0  | 29.2 |
| 08/10/2011 | LANDSAT/LT05/C02/T1_L2/LT05_177025_20111008 | 30 | 0  | 24.5 |
| 23/05/1999 | LANDSAT/LT05/C02/T1_L2/LT05_178025_19990523 | 30 | 6  | 21.5 |
| 24/06/1999 | LANDSAT/LT05/C02/T1_L2/LT05_178025_19990624 | 30 | 0  | 31.2 |
| 26/07/1999 | LANDSAT/LT05/C02/T1_L2/LT05_178025_19990726 | 30 | 0  | 29.4 |
| 11/08/1999 | LANDSAT/LT05/C02/T1_L2/LT05_178025_19990811 | 30 | 11 | 33.7 |
| 05/09/1999 | LANDSAT/LT05/C02/T1_L2/LT05_177025_19990905 | 30 | 0  | 25.5 |
| 17/05/1997 | LANDSAT/LT05/C02/T1_L2/LT05_178025_19970517 | 30 | 1  | 23   |
| 14/06/1998 | LANDSAT/LT05/C02/T1_L2/LT05_177025_19980614 | 30 | 0  | 39.8 |
| 16/07/1998 | LANDSAT/LT05/C02/T1_L2/LT05_177025_19980716 | 30 | 2  | 31.8 |
| 23/07/1998 | LANDSAT/LT05/C02/T1_L2/LT05_178025_19980723 | 30 | 0  | 30.4 |
| 01/08/1998 | LANDSAT/LT05/C02/T1_L2/LT05_177025_19980801 | 30 | 1  | 35.8 |
| 09/09/1998 | LANDSAT/LT05/C02/T1_L2/LT05_178025_19980909 | 30 | 1  | 20.4 |
| 07/05/1996 | LANDSAT/LT05/C02/T1_L2/LT05_177025_19960507 | 30 | 1  | 25.2 |
| 30/05/1996 | LANDSAT/LT05/C02/T1_L2/LT05_178025_19960530 | 30 | 5  | 26.6 |
| 24/06/1996 | LANDSAT/LT05/C02/T1_L2/LT05_177025_19960624 | 30 | 0  | 30.4 |
| 10/07/1996 | LANDSAT/LT05/C02/T1_L2/LT05_177025_19960710 | 30 | 0  | 35   |
| 02/08/1996 | LANDSAT/LT05/C02/T1_L2/LT05_178025_19960802 | 30 | 1  | 28.6 |
| 11/08/1996 | LANDSAT/LT05/C02/T1_L2/LT05_178025_19960811 | 30 | 6  | 21.9 |
| 06/09/1997 | LANDSAT/LT05/C02/T1_L2/LT05_178025_19970906 | 30 | 0  | 17.4 |
| 15/07/1995 | LANDSAT/LT05/C02/T1_L2/LT05_178025_19950715 | 30 | 0  | 29   |
| 25/08/1995 | LANDSAT/LT05/C02/T1_L2/LT05_177025_19950825 | 30 | 3  | 28.4 |
| 17/04/1992 | LANDSAT/LT05/C02/T1_L2/LT05_178025_19920417 | 30 | 1  | 19.5 |
| 03/05/1992 | LANDSAT/LT05/C02/T1_L2/LT05_178025_19920503 | 30 | 2  | 21.5 |
| 16/08/1992 | LANDSAT/LT05/C02/T1_L2/LT05_177025_19920816 | 30 | 0  | 31.6 |
| 01/09/1992 | LANDSAT/LT05/C02/T1_L2/LT05_177025_19920901 | 30 | 0  | 26.1 |
| 15/04/1991 | LANDSAT/LT05/C02/T1_L2/LT05_178025_19910415 | 30 | 0  | 18.1 |
| 18/06/1991 | LANDSAT/LT05/C02/T1_L2/LT05_178025_19910618 | 30 | 0  | 31   |
| 01/10/1991 | LANDSAT/LT05/C02/T1_L2/LT05_177025_19911001 | 30 | 0  | 25.9 |
| 05/04/1990 | LANDSAT/LT05/C02/T1_L2/LT05_177025_19900405 | 30 | 0  | 21   |
| 01/07/1990 | LANDSAT/LT05/C02/T1_L2/LT05_178025_19900701 | 30 | 1  | 27.3 |
| 14/07/1989 | LANDSAT/LT05/C02/T1_L2/LT05_178025_19890714 | 30 | 0  | 30   |
| 10/04/1986 | LANDSAT/LT05/C02/T1_L2/LT05_177025_19860410 | 30 | 0  | 23.3 |
| 26/04/1986 | LANDSAT/LT05/C02/T1_L2/LT05_177025_19860426 | 30 | 0  | 13.7 |
| 28/05/1986 | LANDSAT/LT05/C02/T1_L2/LT05_177025_19860528 | 30 | 5  | 27.3 |
| 13/06/1986 | LANDSAT/LT05/C02/T1_L2/LT05_177025_19860613 | 30 | 1  | 29.3 |
| 06/07/1986 | LANDSAT/LT05/C02/T1_L2/LT05_178025_19860706 | 30 | 0  | 29.4 |
| 07/08/1986 | LANDSAT/LT05/C02/T1_L2/LT05_178025_19860807 | 30 | 4  | 29.5 |
| 09/05/1985 | LANDSAT/LT05/C02/T1_L2/LT05_177025_19850509 | 30 | 1  | 29.6 |
| 16/07/1984 | LANDSAT/LT05/C02/T1_L2/LT05_178025_19840716 | 30 | 8  | 30.7 |

Table S2. Statistical analysis of LSTs and LULC class using KDE and its metrics (July 1984–2023).

| year | class      | mode                                      | median | IQR  | min   | max   | outliers | spread | skewness | MM |
|------|------------|-------------------------------------------|--------|------|-------|-------|----------|--------|----------|----|
| 2023 | water      | [30.1, 36.59]                             | 35.38  | 4.92 | 27.49 | 46.67 | 52       | 16.51  | 0.1      | 2  |
| 2023 | dense veg  | [30.88, 32.71, 37.59, 52.85]              | 34.65  | 6.69 | 26.88 | 54.59 | 354      | 20.92  | 0.61     | 4  |
| 2023 | urban      | [38.8]                                    | 39.3   | 4.39 | 27.42 | 56.28 | 4194     | 17.68  | 0.18     | 1  |
| 2023 | bare land  | [37.97, 51.49, 54.24]                     | 37.23  | 4.85 | 27.96 | 56.87 | 123      | 16.73  | 0.4      | 3  |
| 2023 | sparse veg | [34.23, 37.73, 51.49, 52.97, 54.36]       | 36.77  | 4.7  | 27.55 | 56.44 | 616      | 16.71  | 0.55     | 5  |
| 2020 | water      | [30.74, 34.4, 40.9]                       | 39.73  | 5.06 | 29.79 | 52.34 | 37       | 17.72  | -0.28    | 3  |
| 2020 | dense veg  | [34.61, 39.87, 53.71]                     | 37.88  | 6.16 | 29.85 | 56.84 | 220      | 17.83  | 0.63     | 3  |
| 2020 | urban      | [41.85, 56.25]                            | 42.46  | 3.74 | 29.78 | 58.9  | 6850     | 15.62  | -0.09    | 2  |
| 2020 | bare land  | [33.14, 41.11, 49.25, 53.37, 55.66]       | 40.35  | 3.15 | 32.31 | 56.14 | 100      | 10.23  | 0.5      | 5  |
| 2020 | sparse veg | [30.71, 41.23]                            | 40.69  | 3.99 | 29.81 | 57.11 | 961      | 15.49  | 0.05     | 2  |
| 2018 | water      | [30.0, 33.96, 40.29, 49.07, 53.77, 55.36] | 40.24  | 5.51 | 29.2  | 56.54 | 491      | 21.97  | 0.29     | 6  |
| 2018 | dense veg  | [33.2, 35.69]                             | 37.39  | 6.36 | 29.11 | 56.16 | 172      | 19.49  | 0.61     | 2  |
| 2018 | urban      | [42.27]                                   | 42.32  | 3.8  | 29.03 | 58.69 | 5496     | 14.97  | -0.14    | 1  |
| 2018 | bare land  | [29.63, 32.48, 43.17, 52.79]              | 43.39  | 3.71 | 28.87 | 54.07 | 133      | 14.23  | -0.55    | 4  |
| 2018 | sparse veg | [29.59, 40.5]                             | 40.68  | 4.31 | 29.05 | 56.09 | 994      | 16.13  | 0.03     | 2  |
| 2014 | water      | [29.15, 35.04, 36.58, 39.51]              | 38.23  | 4.61 | 27.81 | 50.03 | 138      | 17.01  | -0.31    | 4  |
| 2014 | dense veg  | [29.65, 35.31, 39.41]                     | 38.01  | 5.53 | 28.11 | 55.99 | 457      | 16.13  | 0.73     | 3  |
| 2014 | urban      | [31.39, 41.87, 56.89]                     | 42.09  | 3.9  | 27.8  | 57.7  | 4561     | 15.24  | -0.07    | 3  |
| 2014 | bare land  | [28.22, 30.89, 41.4, 51.69]               | 40.6   | 4.07 | 27.83 | 57.55 | 359      | 14.55  | -0.1     | 4  |
| 2014 | sparse veg | [30.09, 40.29, 54.59]                     | 39.23  | 4.52 | 27.98 | 56.84 | 505      | 14.74  | 0.32     | 3  |
| 2011 | water      | [29.34, 37.12]                            | 35.99  | 3.99 | 27.8  | 47.33 | 109      | 14.71  | 0.01     | 2  |
| 2011 | dense veg  | [32.99]                                   | 35.3   | 4.86 | 27.8  | 55.83 | 1039     | 15.94  | 1.08     | 1  |
| 2011 | urban      | [38.5, 57.29]                             | 39.2   | 4.13 | 27.79 | 58.17 | 3947     | 15.97  | 0.34     | 2  |
| 2011 | bare land  | [28.2, 37.87, 50.95, 54.01]               | 37.55  | 4.06 | 27.79 | 56.96 | 293      | 16.73  | 0.45     | 4  |
| 2011 | sparse veg | [37.78, 50.71, 52.6, 54.75]               | 37.08  | 3.8  | 27.8  | 57.75 | 1284     | 14.27  | 0.74     | 4  |
| 2006 | water      | [25.39, 29.88, 35.91]                     | 35.01  | 5.57 | 24.37 | 51.11 | 87       | 19.54  | -0.17    | 3  |
| 2006 | dense veg  | [29.46, 35.66]                            | 32.89  | 6.9  | 24.98 | 54.22 | 404      | 21.1   | 0.69     | 2  |
| 2006 | urban      | [36.66, 56.29, 57.48]                     | 37.34  | 4.38 | 24.37 | 57.55 | 5212     | 18.36  | 0.19     | 3  |
| 2006 | bare land  | [36.16, 51.39]                            | 36.44  | 4.25 | 24.93 | 54.6  | 832      | 19.95  | 0.43     | 2  |
| 2006 | sparse veg | [35.93, 52.17, 55.83, 57.07, 58.95]       | 35.58  | 4.52 | 24.93 | 59.16 | 1529     | 17.88  | 0.43     | 5  |
| 1999 | water      | [28.24, 33.51, 38.63, 54.14]              | 38.67  | 5.38 | 27.54 | 54.3  | 159      | 19.77  | -0.26    | 4  |
| 1999 | dense veg  | [33.01, 38.04]                            | 37.31  | 5.58 | 27.54 | 56.44 | 649      | 18.51  | 0.5      | 2  |
| 1999 | urban      | [38.56, 53.06]                            | 39.63  | 4.3  | 27.54 | 56.44 | 3275     | 16.69  | 0.3      | 2  |
| 1999 | bare land  | [28.53, 38.94, 50.82]                     | 39.66  | 4.51 | 27.54 | 57.66 | 630      | 17.85  | -0.12    | 3  |
| 1999 | sparse veg | [38.52, 52.1, 54.23]                      | 38.92  | 4.01 | 27.55 | 56.71 | 682      | 15.76  | 0.04     | 3  |
| 1996 | water      | [28.5, 30.54, 35.19, 39.02]               | 38.61  | 4.16 | 27.07 | 48.31 | 568      | 17.3   | -0.53    | 4  |
| 1996 | dense veg  | [29.43, 35.91, 39.04]                     | 38.12  | 4.48 | 27.07 | 56.52 | 1320     | 16.01  | 0.81     | 3  |
| 1996 | urban      | [29.63, 39.52, 53.68]                     | 40.99  | 4.5  | 27.07 | 59.05 | 2637     | 16.3   | 0.33     | 3  |
| 1996 | bare land  | [27.98, 39.39, 52.39, 56.08, 57.51]       | 39.86  | 4.11 | 27.07 | 59.45 | 446      | 17.28  | -0.25    | 5  |
| 1996 | sparse veg | [39.2, 52.54, 54.28, 57.04]               | 39.35  | 3.16 | 27.07 | 58.06 | 3839     | 13.21  | 0.38     | 4  |
| 1990 | water      | [25.71, 29.51, 34.01]                     | 33.07  | 5.15 | 24.9  | 45.54 | 16       | 17.07  | 0.13     | 3  |
| 1990 | dense veg  | [29.03, 34.51]                            | 31.8   | 5.76 | 25.3  | 54.91 | 867      | 17.84  | 1.11     | 2  |

---

---

[illegible]

|      |   |       |      |       |      |       |      |       |      |       |      |
|------|---|-------|------|-------|------|-------|------|-------|------|-------|------|
| 1999 | 5 | 29.37 | 4.97 | 28.78 | 4.42 | 32.05 | 3.53 | 35.18 | 4.39 | 31.56 | 4.01 |
| 1999 | 6 | 35.34 | 4.33 | 36.33 | 4.15 | 39.96 | 3.4  | 40.58 | 3.37 | 38.78 | 3.43 |
| 1999 | 7 | 36.33 | 4.05 | 36.49 | 4.15 | 39.95 | 3.48 | 40.27 | 4.26 | 38.84 | 3.28 |
| 1999 | 8 | 35.05 | 3.91 | 35.17 | 3.25 | 37.98 | 2.9  | 39.46 | 3.33 | 36.83 | 2.99 |
| 1999 | 9 | 28.49 | 3.76 | 27.41 | 2.9  | 29.39 | 2.58 | 32.1  | 4.06 | 29.84 | 3.36 |
| 1998 | 4 |       |      |       |      |       |      |       |      |       |      |
| 1998 | 5 | 27.06 | 4.44 | 27.72 | 4.25 | 31.96 | 3.25 | 32.76 | 3.65 | 30.91 | 3.42 |
| 1998 | 6 | 39.29 | 4.49 | 39.07 | 4.09 | 42.42 | 3.39 | 44.56 | 3.83 | 41.15 | 3.34 |
| 1998 | 7 | 34.27 | 3.83 | 34.73 | 4.27 | 38.25 | 3.57 | 37.42 | 3.43 | 36.88 | 3.22 |
| 1998 | 8 | 39.32 | 3.45 | 38.7  | 3.74 | 41.84 | 3.52 | 41.61 | 3.41 | 40.13 | 2.98 |
| 1998 | 9 | 26.13 | 4.68 | 24.76 | 3.16 | 25.62 | 2.67 | 26.06 | 3.06 | 25.97 | 3.07 |
| 1996 | 4 |       |      |       |      |       |      |       |      |       |      |
| 1996 | 5 | 35.57 | 4.4  | 33.45 | 4.21 | 37.34 | 3.57 | 38.29 | 4.07 | 36.25 | 3.68 |
| 1996 | 6 | 36.37 | 3.7  | 35.48 | 4.15 | 38.88 | 3.55 | 37.7  | 3.45 | 37.39 | 3.29 |
| 1996 | 7 | 38.21 | 3.3  | 37.99 | 3.59 | 41.08 | 3.49 | 39.91 | 3.58 | 39.34 | 2.98 |
| 1996 | 8 | 30.29 | 3.15 | 28.76 | 3.35 | 31.59 | 2.93 | 31.69 | 3.15 | 30.89 | 2.64 |
| 1996 | 9 | 21.66 | 2.89 | 19.81 | 3.02 | 22.03 | 2.38 | 23.08 | 2.91 | 21.86 | 2.23 |

Figure S4. SUHI maps for July over the years.

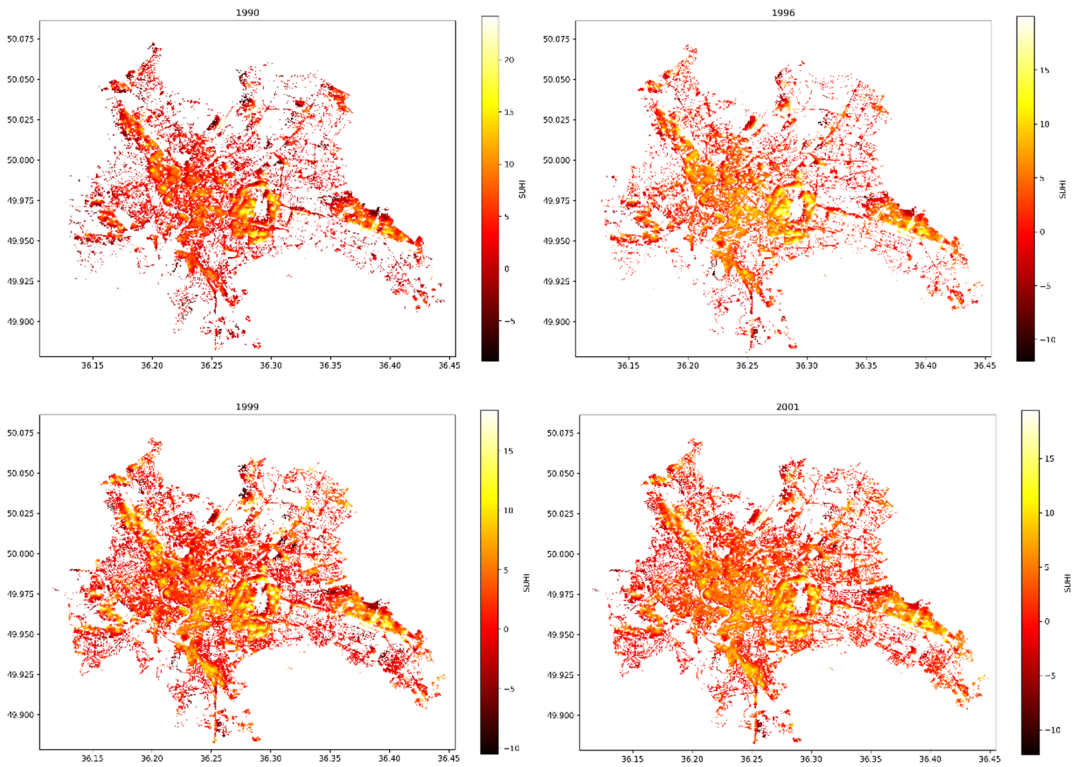

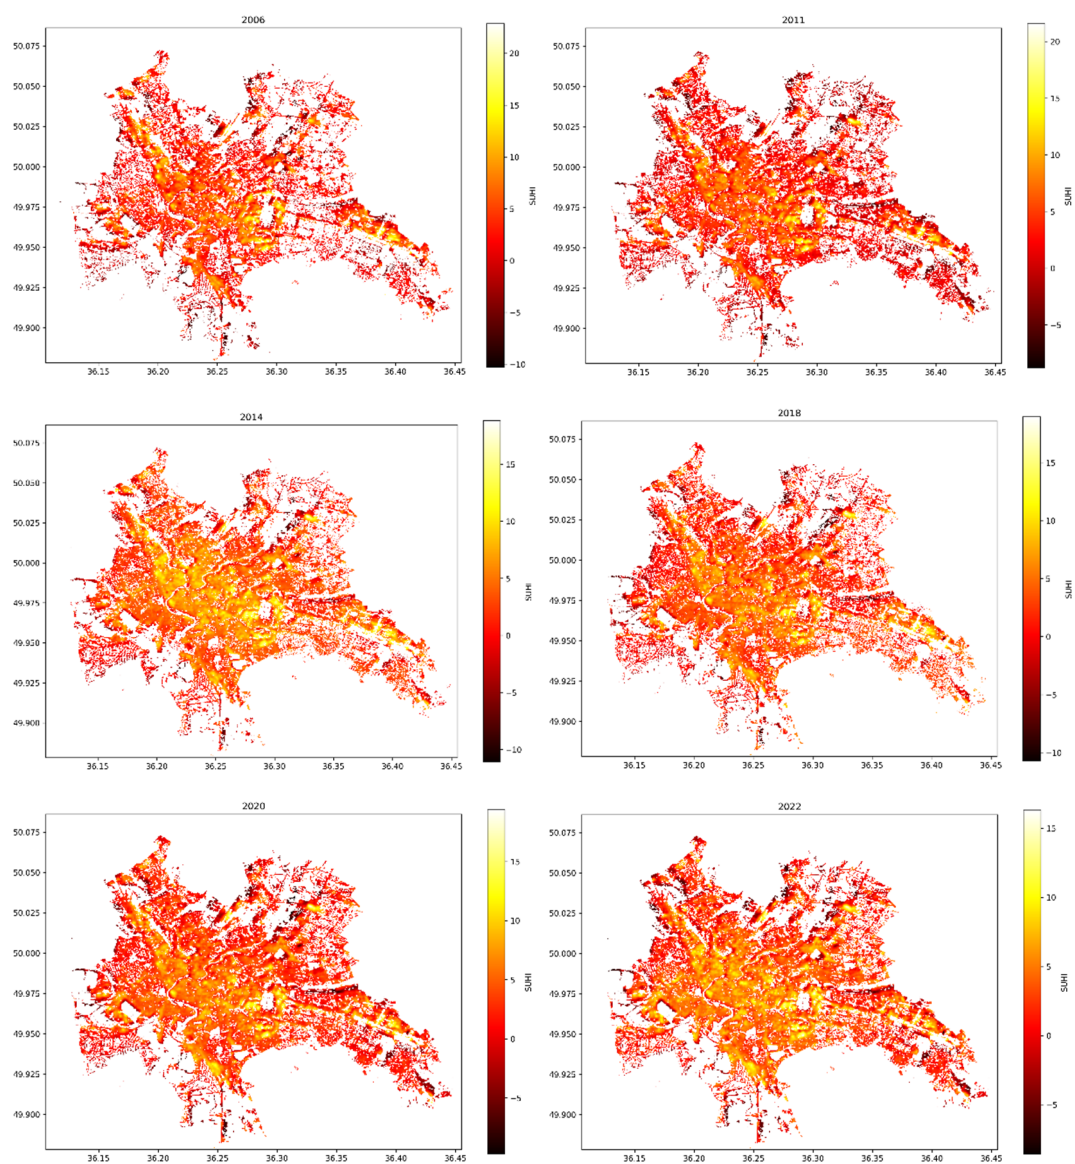

Supplement: s1 [file s1]
